# Supplementary material for: Immunogenicity of Hepatitis B Vaccination in Patients with Ulcerative Colitis on Infliximab Is Attenuated Compared to Those on 5-Aminosalicylic Acid Therapies: A Prospective Observational Study
Source: MDPI journal article supplement (doi:10.3390/vaccines12040364), 2024-03-27
Supplement: s1 [file s1]

**Supplementary File S2:** Baseline and clinical characteristics comparison after classifying the study population based on HBV vaccine response.

|                                              | <b>Adequate response<br/>(<math>\geq 10</math>-99, n=65)</b> | <b>Effective response<br/>(<math>\geq 100</math> n=53)</b> | <b>p-value</b> |
|----------------------------------------------|--------------------------------------------------------------|------------------------------------------------------------|----------------|
| <b>Age</b> (Mean $\pm$ S.D)                  | 34.1 $\pm$ (12.1)                                            | 34.7 $\pm$ (12.5)                                          | 0.806          |
| <b>BMI</b> (Mean $\pm$ S.D)                  | 26.2 $\pm$ (5.4)                                             | 24.7 $\pm$ (4.5)                                           | 0.093          |
| <b>Gender, N (%)</b>                         |                                                              |                                                            | 0.765          |
| Male                                         | 35.0 (53.8%)                                                 | 30.0 (56.6%)                                               |                |
| Female                                       | 30.0 (46.2%)                                                 | 23.0 (43.4%)                                               |                |
| <b>Smoking, N (%)</b>                        |                                                              |                                                            | 0.638          |
| Smoker                                       | 9.0 (13.8%)                                                  | 9.0 (17.0%)                                                |                |
| Non-Smoker                                   | 56.0 (86.2%)                                                 | 44.0 (83.0%)                                               |                |
| <b>UC Type, N (%)</b>                        |                                                              |                                                            | 0.762          |
| E1                                           | 9.0 (13.8%)                                                  | 5.0 (9.4%)                                                 |                |
| E2                                           | 22.0 (33.8%)                                                 | 19.0 (35.8%)                                               |                |
| E3                                           | 34.0 (52.3%)                                                 | 29.0 (54.7%)                                               |                |
| <b>Inflammatory markers</b> (Mean $\pm$ S.D) |                                                              |                                                            | 0.373          |
| Albumin, g/L                                 | 49 $\pm$ (6.4)                                               | 43 $\pm$ (5.8)                                             |                |
| CRP, mg/L                                    | 6.0 $\pm$ (4.5)                                              | 5.8 $\pm$ (4.4)                                            |                |
| Stool fecal calprotectin, ug/g               | 113 $\pm$ (12.0)                                             | 111 $\pm$ (11.7)                                           |                |
