# Supplementary material for: Immunogenicity of Hepatitis B Vaccination in Patients with Ulcerative Colitis on Infliximab Is Attenuated Compared to Those on 5-Aminosalicylic Acid Therapies: A Prospective Observational Study
Source: MDPI journal article supplement (doi:10.3390/vaccines12040364), 2024-03-27
Supplement: s1 [file s1]

**Supplementary Table S1:** HBsAb levels in response to HBV vaccination.

| HBsAb level group | Control group | Study group  | Odds Ratio<br>(95% CI) | p-value |
|-------------------|---------------|--------------|------------------------|---------|
|                   | N (%)         | N (%)        |                        |         |
| 10-99 IU/L        | 14.0 (23.3%)  | 51.0 (87.9%) | 23.9 (8-64)            | <0.005  |
| ≥100 IU/L         | 46.0 (76.7%)  | 7.0 (12.1%)  |                        |         |
